# Supplementary material
Source: publisher figshare collection journal article supplement (https://gsapubs.figshare.com/ndownloader/files/23307293)
Supplement: Supplementary file 1 [file 23307293]

**GSA Data Repository 2018104**

**A mineralogical signature for Burgess Shale-type fossilization**

Ross P. Anderson, Nicholas J. Tosca, Robert R. Gaines, Nicolás Mongiardino Koch, and Derek  
E.G. Briggs

Email: [ross.anderson@all-souls.ox.ac.uk](mailto:ross.anderson@all-souls.ox.ac.uk)

### Further methodological particulars

Samples were taken from the collections of R.R. Gaines (n = 184), the Oxford University Museum of Natural History (n = 11), and the Yale Peabody Museum of Natural History (n = 18).

Matrix material was selected randomly from that immediately surrounding (i.e., within a few centimeters) the fossil (in the case of museum specimens), or from the same bed as fossiliferous material (in the case of specimens in the collection of R.R. Gaines). Samples from which BST fossils are considered absent were selected from localities where significant collection efforts have revealed no soft-bodied fossils in these particular horizons. Although absence of recovered BST fossils does not provide absolute evidence of their absence from these horizons, we compared these samples to many others in our dataset in which soft bodied fossils are conspicuous and abundant. Material was hand-ground to approximately 10  $\mu\text{m}$  grain size with a porcelain pestle and mortar. Enough matrix material was ground to adequately cover single silicon crystal substrates 27 mm in diameter.

All X-ray diffraction (XRD) peak positions were adjusted to correct for slight variations in sample height displacement error using positions of quartz reflections as internal standards. Analysis of the 060 region identified other peaks in the range 1.520–1.530  $\text{\AA}$ , but their abundance was positively correlated with that of calcite obtained from the bulk analysis, consistent with the identification of variable quantities of this mineral through bulk analysis (Kendall's  $\tau = 0.6344$ ,  $P < 10^{-16}$ ). Additional confirmation of clay mineral species was obtained through analysis of oriented  $< 2 \mu\text{m}$  clay separates. Such separates were analyzed from 22 samples representing the entire suite of clay minerals observed, in order to ensure consistency in clay mineral identification with the 060 powder analysis. The mineral identifications were consistent between the two methods.

### Statistical methodology

Abundance of all clay minerals showed a highly skewed zero-inflated distribution, resulting in a departure from multivariate normality, and most pairs of clay minerals proved to be significantly correlated (Fig. DR2). We therefore transformed the dataset to a matrix of pair-wise Euclidean distances between observations, and we used principal coordinate analysis (PCoA) to visualize the variability. Differences in clay mineral composition between samples with BST fossils and those with only fossil mineralized skeletons were tested using PERMANOVA (permutational multivariate analysis of variance, Anderson, 2001). Differences in the multivariate spread of both groups were tested using permutational analysis of multivariate dispersion, hereafter PERMDISP (Anderson, 2006). Both analyses were implemented using the package *vegan* (Oksanen et al., 2016), and significance was evaluated by performing  $10^5$  permutations.

We performed a multiple logistic regression to investigate how different clay minerals affected the probability of samples containing BST fossils. This regression used the six clay mineral abundance variables as predictors of a binary outcome: the presence of BST fossils or the presence of only fossil mineralized skeletons. The best fitting logistic model was determined using stepwise variable selection in both directions. At each step, the inclusion or exclusion of any given predictor from the model was assessed using likelihood ratio tests (LRT). The best fitting model was visualized with the package *visreg* (Breheny and Burchett, 2016).

Finally, the relationship between clay mineral composition and BST fossil-bearing samples was explored using a conditional inference classification tree (Strobl et al., 2009) built using the package *partykit* (Hothorn and Zeileis, 2015). This approach selects the predictor with the strongest association with the response variable (using Bonferroni adjusted  $P$  values), implements a binary split, and iterates over the newly generated subsets of data until the null hypothesis of independence cannot be rejected (Hothorn et al., 2006). This procedure guarantees unbiased variable selection and avoids overfitting (Hothorn and Zeileis, 2015).

The goodness of fit of the models derived from these two approaches (logistic regression and classification tree) was evaluated based on classification accuracy.

### **Independence of samples**

The statistical models are all based on the assumption that each observation is independent. Many of our samples derive from stratigraphic suites from the same geological formation and locality. Clay mineral assemblages are controlled in part by the provenance of detrital clay input into a geological basin over time, and the impact of diagenesis on that detrital assemblage. Thus, the possibility that clay composition could be similar in samples from the same succession must be taken into account in interpreting the significance of the results presented here. Where multiple samples were taken from the same formation, each distinct horizon is represented by just one sample. All samples therefore derive from different depositional events, which reduces the expected dependence between samples. Furthermore, methods accommodating some lack of independence among observations from the same locality were also tested whenever possible. We ran the multiple logistic regression model using the Huber-White method (Huber, 1967; White, 1982), which adjusts the variance-covariance matrix to correct for correlated responses from clustered samples (Cameron and Miller, 2015), with formation provenance as clustering variable. This analysis supported the same results ( $P \leq 0.0001$  for illite composition 1 and illite composition 2, 0.0023 for berthierine/chamosite and 0.029 for celadonite). Thus, the stratigraphic bundling of a proportion of the samples does not compromise our conclusions regarding the effect of clay minerals on organic preservation.

### **Absolute abundances of clays**

Obtaining the absolute abundance of clay minerals within a given sample is challenging. While quantitative data can be obtained using Rietveld refinement (Snyder and Bish, 1989), such a procedure is not feasible on a sample set of this size. To obtain semi-quantitative estimates of abundances we scaled the relative clay mineral proportions from the 060 region to the total clay fraction from the bulk mineralogical analysis. This total fraction was determined by summing all identified clay mineral abundances in the bulk results and, for selected samples, checking this relationship against the total integrated area of the 020 reflection, common to all layer silicates (Środoń et al., 2001). This technique preserved the relative differences in clay content between samples.

### **The influence of diagenetic carbonate minerals on statistical models**

There is evidence that carbonate minerals in many of these rocks are a product of early diagenesis (e.g., Gaines et al., 2012). We removed both calcite and dolomite from the mineralogical data and adjusted the abundances of the other minerals accordingly, in an attempt to better represent the original (pre-diagenetic) mineralogical composition of the samples. The

results remain robust to this adjustment: the logistic regression model is almost identical, including significant effects of illite composition 1, illite composition 2, berthierine/chamosite, and celadonite ( $P = 2.2\text{e}^{-12}$ ,  $9.4\text{e}^{-7}$ ,  $4.8\text{e}^{-4}$ , and  $2.6\text{e}^{-3}$ , respectively), as well as a marginally significant effect of glauconite ( $P = 0.046$ ). Kaolinite has no effect ( $P = 0.14$ ).

### **The influence of illite composition 1 and the Kaili Formation on statistical models**

The abundance of illite composition 1 is a crucial factor in distinguishing samples that contain BST fossils from those that contain only fossil mineralized skeletons. Not only is it recovered by both models as the most important predictor of association with carbonaceous fossils, it is also significantly negatively correlated with the abundance of all other clay minerals (Fig. DR2). The Kaili Formation, which represents 22% of our entire dataset, is especially rich in illite composition 1, with a mean abundance of 37.9% (standard deviation = 22.8%) compared to only 2.05% (standard deviation = 10.36%) in all other samples. In order to test whether the samples from the Kaili Formation bias our results, we ran the multiple logistic regression without them. The results are robust to the removal of Kaili samples. Not only did illite composition 1 remain the most significant predictor of whether a sample would contain BST fossils, the model supported was identical, including illite composition 2, celadonite, and berthierine/chamosite ( $P = 2.2\text{e}^{-6}$ ,  $1.9\text{e}^{-7}$ ,  $5.0\text{e}^{-3}$  and  $2.4\text{e}^{-2}$ , respectively). No significant effect of glauconite or kaolinite was detected ( $P = 0.26$  and  $0.34$ , respectively).

### **Origin of the observed clay mineral assemblage**

The composition of the observed clay mineral assemblages depends on the original detrital material and the degree to which it has been transformed in response to pore water chemistry during early and/or late diagenesis (including burial metamorphism). Thus, clay mineral assemblages are prone to alteration by weathering. In fine-grained siliciclastic rocks, the mineral most susceptible to weathering is pyrite, which if chemically altered could mobilize iron and might lead to secondary precipitation of Fe-minerals such as berthierine. But Fe-oxides, and jarosite in particular, which are the major products of pyrite weathering, are absent from our samples. Kaolinite, however, is conspicuously absent even though many of these rocks were deposited at tropical paleolatitudes, further supporting a diagenetic origin for berthierine through kaolinite conversion during early and/or late diagenesis (e.g., Bhattacharyya, 1983; Taylor, 1990; Taylor and Curtis, 1995; Fritz and Toth, 1997; Toth and Fritz, 1997; Rivard et al., 2013). Where berthierine has been reported from laterites rich in kaolinite and Fe-oxides (e.g., Toth and Fritz, 1997 and references therein), these laterites have been drowned by marine transgressions, or stagnant groundwater flow has led to reductive diagenetic transformation of goethite and kaolinite to berthierine. Berthierine is not a product of the chemical weathering process *sensu stricto*, but a product derived from the reaction between  $\text{Fe}^{2+}$  and kaolinite (i.e., Bhattacharyya, 1983). This relationship also explains why the major occurrence of berthierine is in ironstones, where it alternates with glauconite as an authigenic cement (Pufahl, 2010). The diagenetic transformation of kaolinite in the presence of  $\text{Fe}^{2+}$  drives this process (demonstrated in the laboratory by Bhattacharyya, 1983): goethite and kaolinite are dominant detrital components of the tropical soils that generate the ironstones (Pufahl, 2010). We therefore do not consider weathering to have compromised our data in a significant manner, particularly in relation to the formation of berthierine.

## References

- Anderson, M. J., 2001, A new method for non-parametric multivariate analysis of variance: *Austral Ecology*, v. 26, no. 1, p. 32–46.
- Anderson, M. J., 2006, Distance-based tests for homogeneity of multivariate dispersions: *Biometrics*, v. 62, no. 1, p. 245–253.
- Bhattacharyya, D. P., 1983, Origin of berthierine in ironstones: *Clays and Clay Minerals*, v. 31, no. 3, p. 173–182.
- Breheny, P., and Burchett, W., 2016, Visualization of Regression Models using visreg.
- Cameron, A. C., and Miller, D. L., 2015, A practitioner's guide to cluster-robust inference: *Journal of Human Resources*, v. 50, no. 2, p. 317–372.
- Fritz, S. J., and Toth, T. A., 1997, An Fe-berthierine from a Cretaceous laterite: Part II. Estimation of Eh, pH, and pCO<sub>2</sub> conditions of formation: *Clays and Clay Minerals*, v. 45, no. 4, p. 580–586.
- Gaines, R. R., Hammarlund, E. U., Hou, X., Qi, C., Gabbott, S. E., Zhao, Y., Peng, J., and Canfield, D. E., 2012, Mechanism for Burgess Shale-type preservation: *Proceedings of the National Academy of Sciences*, v. 109, no. 14, p. 5180–5184.
- Hothorn, T., Hornik, K., and Zeileis, A., 2006, Unbiased recursive partitioning: A conditional inference framework: *Journal of Computational and Graphical statistics*, v. 15, no. 3, p. 651–674.
- Hothorn, T., and Zeileis, A., 2015, partykit: A modular toolkit for recursive partytioning in R: *Journal of Machine Learning Research*, v. 16, p. 3905–3909.
- Huber, P. J., 1967, The behaviour of maximum likelihood estimates under nonstandard conditions: *Proceedings of the fifth Berkeley symposium on mathematical statistics and probability*, p. 221–233.
- Oksanen, J., Blanchet, F. G., Kindt, R., Legendre, P., Minchin, P. R., O'Hara, R. B., Simpson, G. L., Solymos, P., Stevens, M. H. H., and Wagner, H., 2016, vegan: Community Ecology Package.
- Pufahl, P. K., 2010, Bioelemental sediments, Facies models 4, Volume 6, Geological Association of Canada GEOText, p. 477–503.
- Rivard, C., Pelletier, M., Michau, N., Razafitianamaharevo, A., Bihannic, I., Abdelmoula, M., Ghanbaja, J., and Villéras, F., 2013, Berthierine-like mineral formation and stability during interaction of kaolinite with metallic iron at 90°C under anoxic and oxic conditions: *American Mineralogist*, v. 98, no. 1, p. 163–180.
- Snyder, R. L., and Bish, D. L., 1989, Quantitative analysis, *in* Bish, D.L., and Post, J.E., eds., *Modern Powder Diffraction: Reviews in Mineralogy*, v. 20, Mineralogical Society of America, p. 101–144.
- Środoń, J., Drits, V. A., McCarty, D. K., Hsieh, J. C. C., and Eberl, D. D., 2001, Quantitative X-ray diffraction analysis of clay-bearing rocks from random preparations: *Clays and Clay Minerals*, v. 49, no. 6, p. 514–528.
- Strobl, C., Malley, J., and Tutz, G., 2009, An introduction to recursive partitioning: rationale, application, and characteristics of classification and regression trees, bagging, and random forests: *Psychological Methods*, v. 14, no. 4, p. 323.
- Taylor, K. G., 1990, Berthierine from the non-marine Wealden (Early Cretaceous) sediments of south-east England: *Clay Minerals*, v. 25, no. 3, p. 391–399.

- Taylor, K. G., and Curtis, C. D., 1995, Stability and facies association of early diagenetic mineral assemblages: An example from a Jurassic ironstone-mudstone succession, UK: *Journal of Sedimentary Research*, v. 65, no. 2a, p. 358-368.
- Toth, T. A., and Fritz, S. J., 1997, An Fe-berthierine from a Cretaceous laterite: Part I. Characterization: *Clays and Clay Minerals*, v. 45, no. 4, p. 564–579.
- White, H., 1982, Maximum likelihood estimation of misspecified models: *Econometrica: Journal of the Econometric Society*, p. 1–25.

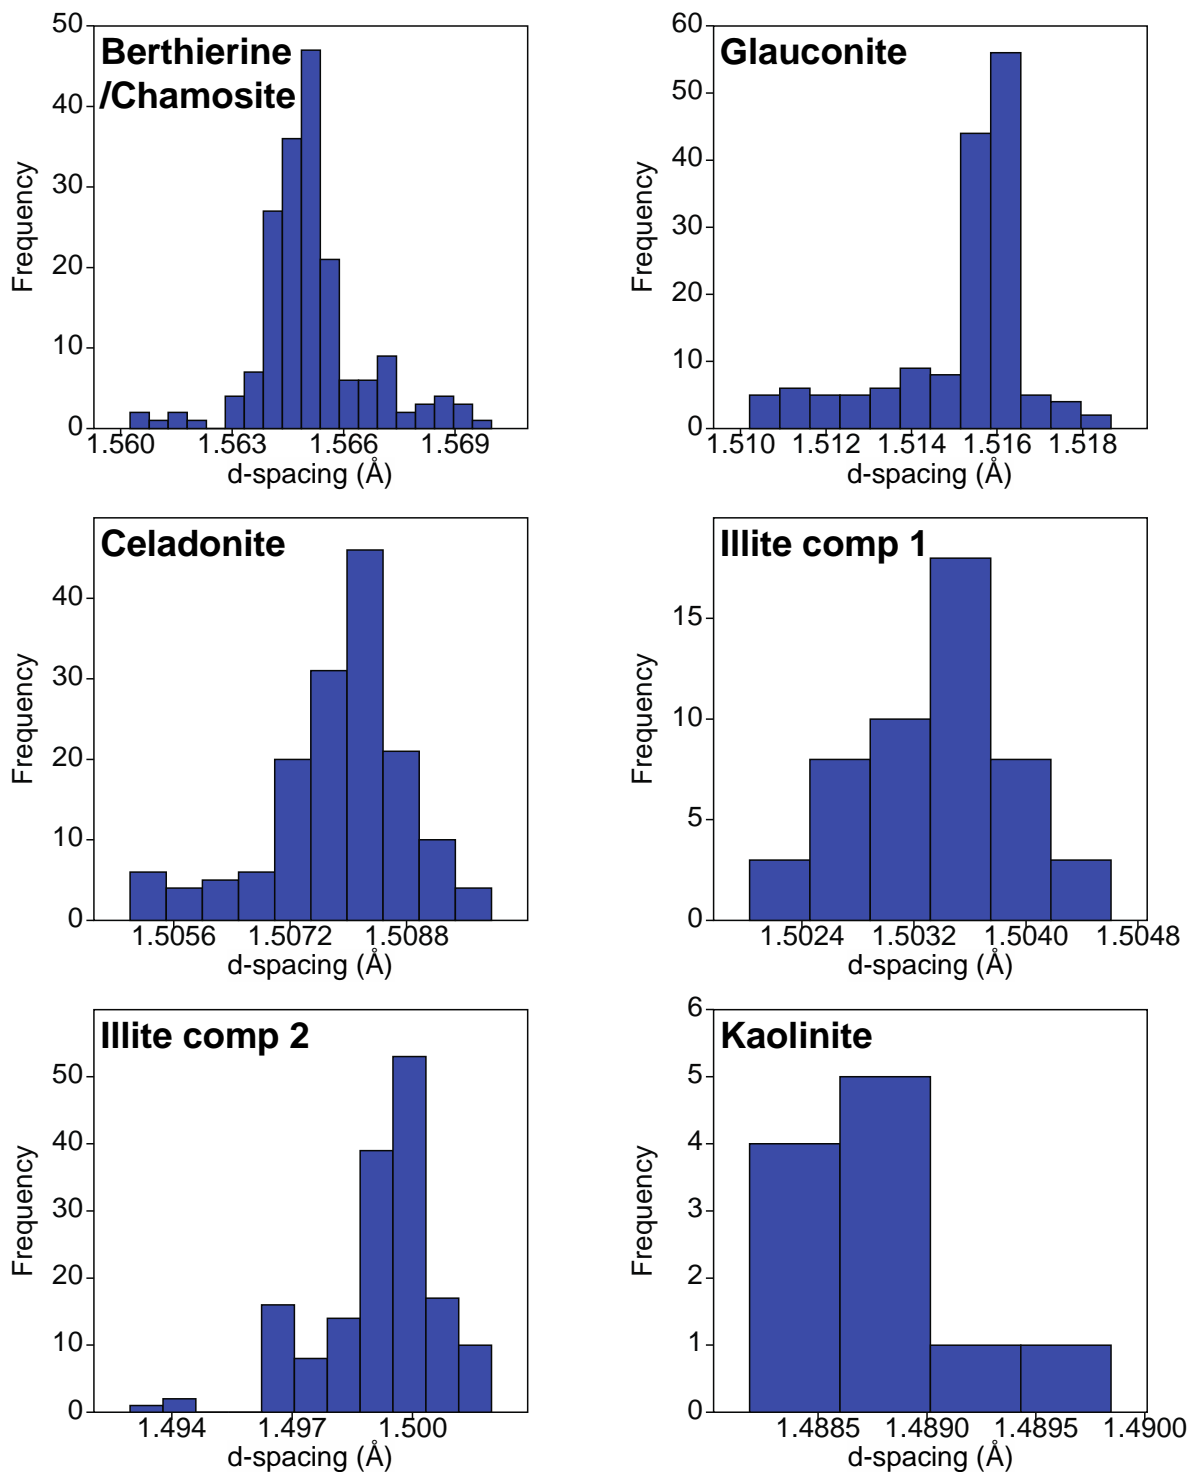

**Figure DR1:** Frequency distributions of d-spacing for 060 peaks of berthierine/chamosite (1.560–1.570 Å), glauconite (1.510–1.519 Å), celadonite (1.505–1.510 Å), illite composition 1 (1.502–1.505 Å), illite composition 2 (1.493–1.502 Å), and kaolinite (~1.489 Å).

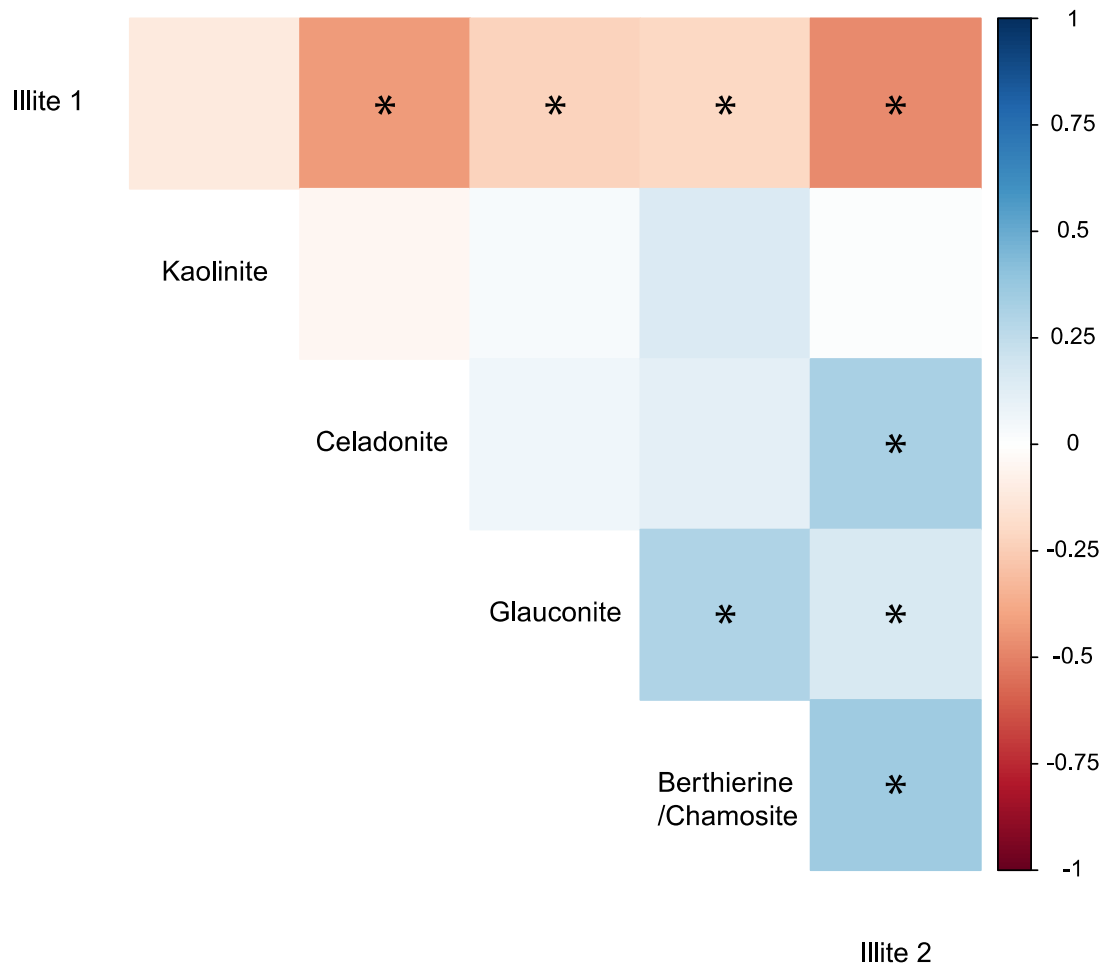

**Figure DR2:** Correlation matrix for the abundance of clay minerals included in the analysis. Grid colors represent Kendall's  $\tau$ , and significant levels of correlation after applying Bonferroni correction are marked with an asterisk. Severe correlation between predictor variables (multicollinearity) can influence the results of a logistic regression by inflating the standard errors of the coefficients. Nonetheless, our dataset shows only moderate levels of multicollinearity which should not have a strong impact on the results (variance inflation factors for all variables  $\leq 1.56$ ).



| Sample Name | Country | Stratigraphy |        |                   |        | Contains<br>BST fossils | Composition (% rock) |      |     |      |     |      |      |      |      |
|-------------|---------|--------------|--------|-------------------|--------|-------------------------|----------------------|------|-----|------|-----|------|------|------|------|
|             |         | Formation    | Member | Sequence          | Height |                         | Qtz                  | Calc | Dol | Bth  | Gl  | Cel  | Il 1 | Il 2 | Kaol |
| CMj SG 0.85 | USA     | Marjum       |        | Sponge Gulch      | 0.85   | Y                       | 34.0                 | 22.0 |     | 9.0  | 5.1 | 11.0 | 0.0  | 7.9  | 0.0  |
| CMj SG 0.93 | USA     | Marjum       |        | Sponge Gulch      | 0.93   | Y                       | 32.0                 | 18.0 |     | 15.6 | 8.9 | 14.1 | 0.0  | 11.4 | 0.0  |
| CMj SG 0.98 | USA     | Marjum       |        | Sponge Gulch      | 0.98   | Y                       | 36.0                 | 25.0 |     | 9.4  | 5.1 | 13.0 | 0.0  | 10.5 | 0.0  |
| CMj RW 1.26 | USA     | Marjum       |        | Red Cliffs Wash   | 1.26   | Y                       | 31.0                 | 19.0 |     | 7.0  | 7.7 | 18.0 | 0.0  | 15.3 | 0.0  |
| CMj RW 1.28 | USA     | Marjum       |        | Red Cliffs Wash   | 1.28   | Y                       | 32.0                 | 17.0 |     | 8.0  | 5.2 | 16.5 | 0.0  | 18.3 | 0.0  |
| CMj RW 1.38 | USA     | Marjum       |        | Red Cliffs Wash   | 1.38   | Y                       | 30.0                 | 14.0 |     | 7.5  | 7.0 | 15.6 | 0.0  | 16.9 | 0.0  |
| CMj RW 1.44 | USA     | Marjum       |        | Red Cliffs Wash   | 1.44   | Y                       | 28.0                 | 12.0 | 4.0 | 8.3  | 4.3 | 17.3 | 0.0  | 19.2 | 0.0  |
| CMj RW 1.82 | USA     | Marjum       |        | Red Cliffs Wash   | 1.82   | Y                       | 25.0                 | 16.0 | 5.0 | 6.4  | 8.9 | 15.0 | 0.0  | 19.7 | 0.0  |
| CMj RW 1.92 | USA     | Marjum       |        | Red Cliffs Wash   | 1.92   | Y                       | 41.0                 | 8.0  | 8.0 | 10.9 | 2.8 | 7.8  | 0.0  | 14.4 | 0.0  |
| CMj RW 1.96 | USA     | Marjum       |        | Red Cliffs Wash   | 1.96   | Y                       | 34.0                 | 9.0  | 8.0 | 7.6  | 3.2 | 8.7  | 0.0  | 21.5 | 0.0  |
| CMj WHQ 1   | USA     | Marjum       |        | White Hill Quarry | 1.00   | Y                       | 22.0                 | 15.0 |     | 13.3 | 7.3 | 14.2 | 0.0  | 12.2 | 0.0  |
| CMj WHQ 2   | USA     | Marjum       |        | White Hill Quarry | 2.00   | Y                       | 37.0                 | 21.0 |     | 6.7  | 7.1 | 11.8 | 0.0  | 9.4  | 0.0  |
| CMj WHQ 3   | USA     | Marjum       |        | White Hill Quarry | 3.00   | Y                       | 25.0                 | 24.0 |     | 9.4  | 8.5 | 14.0 | 0.0  | 9.1  | 0.0  |
| CMj WHQ 4   | USA     | Marjum       |        | White Hill Quarry | 4.00   | Y                       | 23.0                 | 25.0 |     | 10.4 | 9.8 | 12.4 | 0.0  | 9.4  | 0.0  |
| CMj WHQ 5   | USA     | Marjum       |        | White Hill Quarry | 5.00   | Y                       | 24.0                 | 19.0 |     | 13.0 | 9.6 | 11.8 | 0.0  | 8.5  | 0.0  |
| CMj KK 7    | USA     | Marjum       |        | Kell's Knolls     | 7.00   | Y                       | 29.0                 | 6.0  |     | 18.2 | 8.8 | 12.2 | 0.0  | 14.8 | 0.0  |
| CMj KK 9    | USA     | Marjum       |        | Kell's Knolls     | 9.00   | Y                       | 25.0                 | 5.0  |     | 17.5 | 7.1 | 12.0 | 0.0  | 14.5 | 0.0  |
| CMj KK 11   | USA     | Marjum       |        | Kell's Knolls     | 11.00  | Y                       | 28.0                 | 6.0  |     | 17.5 | 6.1 | 20.4 | 0.0  | 13.0 | 0.0  |
| CMj KK 13   | USA     | Marjum       |        | Kell's Knolls     | 13.00  | Y                       | 32.0                 | 10.0 |     | 19.2 | 5.7 | 18.3 | 0.0  | 6.8  | 0.0  |
| CMj KK 16   | USA     | Marjum       |        | Kell's Knolls     | 16.00  | Y                       | 30.0                 | 7.0  |     | 18.5 | 4.9 | 13.5 | 0.0  | 13.1 | 0.0  |
| CMj KK 18   | USA     | Marjum       |        | Kell's Knolls     | 18.00  | Y                       | 34.0                 | 8.0  |     | 24.8 | 1.0 | 21.6 | 0.0  | 10.7 | 0.0  |
| CMj KK 20   | USA     | Marjum       |        | Kell's Knolls     | 20.00  | Y                       | 26.0                 | 7.0  |     | 15.0 | 9.5 | 15.3 | 0.0  | 18.1 | 0.0  |
| CMj KK 24   | USA     | Marjum       |        | Kell's Knolls     | 24.00  | Y                       | 41.0                 | 21.0 |     | 13.2 | 6.1 | 8.2  | 0.0  | 9.6  | 0.0  |
| CMj MPP 64  | USA     | Marjum       |        | Marjum Pass       | 64.00  | Y                       | 22.0                 | 9.0  |     | 19.3 | 9.1 | 13.9 | 0.0  | 16.7 | 0.0  |
| CMj MPP 66  | USA     | Marjum       |        | Marjum Pass       | 66.00  | Y                       | 32.0                 | 15.0 |     | 13.7 | 7.5 | 9.2  | 0.0  | 9.5  | 0.0  |
| CMj MPP 68  | USA     | Marjum       |        | Marjum Pass       | 68.00  | Y                       | 28.0                 | 13.0 |     | 9.7  | 6.0 | 14.4 | 0.0  | 12.9 | 0.0  |
| CMj MPP 70  | USA     | Marjum       |        | Marjum Pass       | 70.00  | Y                       | 37.0                 | 14.0 |     | 15.2 | 5.1 | 18.2 | 0.0  | 7.5  | 0.0  |
| CMj MPP 72  | USA     | Marjum       |        | Marjum Pass       | 72.00  | Y                       | 37.0                 | 23.0 |     | 4.9  | 5.5 | 7.4  | 0.0  | 5.3  | 0.0  |

| Sample Name | Country | Stratigraphy |        |                          |        | Contains<br>BST fossils | Composition (% rock) |      |      |      |      |      |      |      |      |
|-------------|---------|--------------|--------|--------------------------|--------|-------------------------|----------------------|------|------|------|------|------|------|------|------|
|             |         | Formation    | Member | Sequence                 | Height |                         | Qtz                  | Calc | Dol  | Bth  | Gl   | Cel  | Il 1 | Il 2 | Kaol |
| CMj MPP 74  | USA     | Marjum       |        | Marjum Pass              | 74.00  | Y                       | 41.0                 | 25.0 |      | 4.3  | 5.1  | 7.5  | 0.0  | 5.1  | 0.0  |
| CW 3        | USA     | Wheeler      |        | Marjum Pass -<br>Lower   | 3.00   | Y                       | 58.0                 | 12.0 | 9.0  | 0.0  | 0.0  | 0.0  | 0.0  | 0.0  | 0.0  |
| CW 6        | USA     | Wheeler      |        | Marjum Pass -<br>Lower   | 6.00   | Y                       | 75.0                 |      | 14.0 | 1.6  | 0.0  | 0.0  | 0.0  | 9.4  | 0.0  |
| CW 9        | USA     | Wheeler      |        | Marjum Pass -<br>Lower   | 9.00   | Y                       | 37.0                 |      |      | 25.4 | 15.4 | 0.0  | 0.0  | 22.3 | 0.0  |
| CW 12       | USA     | Wheeler      |        | Marjum Pass -<br>Lower   | 12.00  | Y                       | 31.0                 | 13.0 | 6.0  | 10.6 | 3.6  | 15.3 | 0.0  | 19.4 | 0.0  |
| CW 15       | USA     | Wheeler      |        | Marjum Pass -<br>Lower   | 15.00  | Y                       | 28.0                 | 43.0 | 2.0  | 4.0  | 6.5  | 6.0  | 0.0  | 3.6  | 0.0  |
| CW 18       | USA     | Wheeler      |        | Marjum Pass -<br>Lower   | 18.00  | Y                       | 44.0                 | 15.0 |      | 12.0 | 6.9  | 10.4 | 0.0  | 11.7 | 0.0  |
| CW 21       | USA     | Wheeler      |        | Marjum Pass -<br>Lower   | 21.00  | Y                       | 34.0                 | 14.0 | 2.0  | 13.8 | 6.9  | 10.2 | 0.0  | 14.1 | 0.0  |
| CW 24       | USA     | Wheeler      |        | Marjum Pass -<br>Lower   | 24.00  | Y                       | 22.0                 | 21.0 |      | 16.7 | 6.0  | 10.2 | 0.0  | 10.2 | 0.0  |
| CW 27       | USA     | Wheeler      |        | Marjum Pass -<br>Lower   | 27.00  | Y                       | 1.0                  | 8.0  |      | 10.2 | 0.0  | 13.0 | 0.0  | 57.8 | 0.0  |
| CW 30       | USA     | Wheeler      |        | Marjum Pass -<br>Lower   | 30.00  | Y                       |                      |      |      | 12.9 | 0.0  | 10.4 | 0.0  | 49.7 | 0.0  |
| CW 33       | USA     | Wheeler      |        | Marjum Pass -<br>Lower   | 33.00  | Y                       |                      | 78.0 | 7.0  | 0.0  | 0.0  | 0.0  | 0.0  | 0.0  | 0.0  |
| CW 36       | USA     | Wheeler      |        | Marjum Pass -<br>Lower   | 36.00  | Y                       | 25.0                 | 32.0 |      | 12.1 | 7.4  | 13.4 | 0.0  | 4.2  | 0.0  |
| CW SSA 5    | USA     | Wheeler      |        | Swasey Spring -<br>Upper | 5.00   | Y                       | 37.0                 | 12.0 |      | 8.4  | 4.5  | 7.7  | 0.0  | 8.4  | 0.0  |
| CW SSA 20   | USA     | Wheeler      |        | Swasey Spring -<br>Upper | 20.00  | Y                       | 28.0                 | 8.0  | 2.0  | 14.0 | 4.3  | 11.2 | 0.0  | 13.6 | 0.0  |
| CW SSA 22   | USA     | Wheeler      |        | Swasey Spring -<br>Upper | 22.00  | Y                       | 44.0                 | 6.0  |      | 17.9 | 0.0  | 25.3 | 0.0  | 7.8  | 0.0  |
| CW SSA 27   | USA     | Wheeler      |        | Swasey Spring -<br>Upper | 27.00  | Y                       | 59.0                 | 13.0 |      | 5.2  | 5.7  | 6.7  | 0.0  | 8.4  | 0.0  |
| CW SSA 30   | USA     | Wheeler      |        | Swasey Spring -<br>Upper | 30.00  | Y                       | 40.0                 | 18.0 |      | 9.1  | 4.4  | 11.1 | 0.0  | 5.4  | 0.0  |
| CW SSA 32   | USA     | Wheeler      |        | Swasey Spring -<br>Upper | 32.00  | Y                       | 31.0                 | 22.0 |      | 11.3 | 7.4  | 11.6 | 0.0  | 6.7  | 0.0  |
| CW SSA 34   | USA     | Wheeler      |        | Swasey Spring -<br>Upper | 34.00  | Y                       | 25.0                 | 9.0  |      | 13.9 | 8.8  | 13.1 | 0.0  | 16.2 | 0.0  |
| CW SSA 107  | USA     | Wheeler      |        | Swasey Spring -<br>Upper | 107.00 | Y                       | 35.0                 | 16.0 |      | 9.9  | 9.2  | 11.3 | 0.0  | 8.6  | 0.0  |
| CW SSA 109  | USA     | Wheeler      |        | Swasey Spring -<br>Upper | 109.00 | Y                       | 41.0                 | 29.0 |      | 5.0  | 4.1  | 8.6  | 0.0  | 5.4  | 0.0  |

| Sample Name | Country | Stratigraphy |        |                  |        | Contains<br>BST fossils | Composition (% rock) |      |      |      |      |      |      |      |      |
|-------------|---------|--------------|--------|------------------|--------|-------------------------|----------------------|------|------|------|------|------|------|------|------|
|             |         | Formation    | Member | Sequence         | Height |                         | Qtz                  | Calc | Dol  | Bth  | Gl   | Cel  | Il 1 | Il 2 | Kaol |
| CW DMJ 26   | USA     | Wheeler      |        | Drum Mountains   | 26.00  | Y                       | 25.0                 | 14.0 | 10.0 | 18.1 | 6.1  | 7.7  | 0.0  | 10.1 | 0.0  |
| CW DMJ 29   | USA     | Wheeler      |        | Drum Mountains   | 29.00  | Y                       | 14.0                 | 29.0 |      | 8.0  | 7.9  | 14.3 | 0.0  | 5.8  | 0.0  |
| CW DMJ 33   | USA     | Wheeler      |        | Drum Mountains   | 33.00  | Y                       | 35.0                 | 13.0 |      | 12.7 | 6.6  | 8.4  | 0.0  | 11.2 | 0.0  |
| CW DMJ 35   | USA     | Wheeler      |        | Drum Mountains   | 35.00  | Y                       | 27.0                 | 12.0 | 5.0  | 20.1 | 3.1  | 8.1  | 0.0  | 15.7 | 0.0  |
| CW DMJ 44   | USA     | Wheeler      |        | Drum Mountains   | 44.00  | Y                       | 22.0                 | 20.0 | 5.0  | 14.4 | 8.1  | 15.4 | 0.0  | 14.2 | 0.0  |
| CW DMJ 53   | USA     | Wheeler      |        | Drum Mountains   | 53.00  | Y                       | 26.0                 | 20.0 |      | 14.2 | 7.2  | 9.1  | 0.0  | 9.5  | 0.0  |
| CW DMJ 61   | USA     | Wheeler      |        | Drum Mountains   | 61.00  | Y                       | 29.0                 | 32.0 |      | 9.2  | 0.4  | 13.8 | 0.0  | 5.6  | 0.0  |
| CW DMJ 73   | USA     | Wheeler      |        | Drum Mountains   | 73.00  | Y                       | 50.0                 | 18.0 |      | 8.2  | 3.2  | 9.8  | 0.0  | 11.9 | 0.0  |
| CW DMJ 73   | USA     | Wheeler      |        | Drum Mountains   | 73.00  | Y                       | 29.0                 | 14.0 |      | 13.6 | 8.9  | 11.7 | 0.0  | 11.7 | 0.0  |
| CW DMJ 75   | USA     | Wheeler      |        | Drum Mountains   | 75.00  | Y                       | 27.0                 | 7.0  |      | 17.6 | 5.8  | 13.4 | 0.0  | 17.3 | 0.0  |
| CK W0       | China   | Kaili        |        | Wuliu-Zengjiayan | 0.00   | N                       | 4.0                  |      | 88.0 | 0.0  | 0.0  | 0.0  | 0.0  | 0.0  | 0.0  |
| CK W2       | China   | Kaili        |        | Wuliu-Zengjiayan | 2.00   | N                       | 3.0                  |      | 97.0 | 0.0  | 0.0  | 0.0  | 0.0  | 0.0  | 0.0  |
| CK W5       | China   | Kaili        |        | Wuliu-Zengjiayan | 5.00   | N                       | 13.0                 | 52.0 |      | 0.0  | 13.0 | 18.4 | 0.0  | 1.7  | 0.0  |
| CK W7       | China   | Kaili        |        | Wuliu-Zengjiayan | 7.00   | N                       |                      |      |      | 7.2  | 4.0  | 17.9 | 40.0 | 0.0  | 0.0  |
| CK W10      | China   | Kaili        |        | Wuliu-Zengjiayan | 10.00  | N                       | 14.0                 | 72.0 |      | 0.0  | 0.0  | 0.0  | 0.0  | 0.0  | 0.0  |
| CK W15      | China   | Kaili        |        | Wuliu-Zengjiayan | 15.00  | N                       | 38.0                 | 15.0 |      | 9.2  | 3.5  | 0.0  | 32.4 | 0.0  | 0.0  |
| CK W18      | China   | Kaili        |        | Wuliu-Zengjiayan | 18.00  | N                       | 40.0                 | 29.0 |      | 3.7  | 5.5  | 8.9  | 0.0  | 12.0 | 0.0  |
| CK W21      | China   | Kaili        |        | Wuliu-Zengjiayan | 21.00  | N                       | 19.0                 | 40.0 |      | 0.0  | 6.3  | 18.6 | 0.0  | 16.1 | 0.0  |
| CK W24      | China   | Kaili        |        | Wuliu-Zengjiayan | 24.00  | N                       | 51.0                 |      |      | 6.7  | 0.0  | 0.0  | 42.3 | 0.0  | 0.0  |
| CK W26      | China   | Kaili        |        | Wuliu-Zengjiayan | 26.00  | N                       | 30.0                 |      |      | 20.7 | 4.2  | 0.0  | 45.2 | 0.0  | 0.0  |
| CK W34      | China   | Kaili        |        | Wuliu-Zengjiayan | 34.00  | N                       | 35.0                 |      |      | 5.4  | 0.0  | 0.0  | 60.6 | 0.0  | 0.0  |
| CK W40      | China   | Kaili        |        | Wuliu-Zengjiayan | 40.00  | N                       | 41.0                 |      |      | 12.9 | 4.8  | 0.0  | 40.3 | 0.0  | 0.0  |
| CK W43      | China   | Kaili        |        | Wuliu-Zengjiayan | 43.00  | N                       | 35.0                 |      |      | 9.9  | 0.0  | 0.0  | 55.1 | 0.0  | 0.0  |
| CK W46      | China   | Kaili        |        | Wuliu-Zengjiayan | 46.00  | N                       | 30.0                 |      |      | 18.5 | 6.6  | 0.0  | 45.9 | 0.0  | 0.0  |
| CK W50      | China   | Kaili        |        | Wuliu-Zengjiayan | 50.00  | N                       | 41.0                 |      |      | 11.5 | 5.0  | 0.0  | 41.5 | 0.0  | 0.0  |
| CK W56      | China   | Kaili        |        | Wuliu-Zengjiayan | 56.00  | N                       | 24.0                 |      |      | 19.4 | 3.4  | 0.0  | 53.2 | 0.0  | 0.0  |
| CK W60      | China   | Kaili        |        | Wuliu-Zengjiayan | 60.00  | N                       | 32.0                 | 25.0 |      | 0.0  | 19.2 | 0.0  | 23.8 | 0.0  | 0.0  |
| CK W64      | China   | Kaili        |        | Wuliu-Zengjiayan | 64.00  | N                       | 12.0                 |      |      | 8.5  | 0.0  | 0.0  | 65.5 | 0.0  | 0.0  |

| Sample Name | Country | Stratigraphy |        |           |        | Contains<br>BST fossils | Composition (% rock) |      |     |      |     |      |      |      |      |
|-------------|---------|--------------|--------|-----------|--------|-------------------------|----------------------|------|-----|------|-----|------|------|------|------|
|             |         | Formation    | Member | Sequence  | Height |                         | Qtz                  | Calc | Dol | Bth  | Gl  | Cel  | Il 1 | Il 2 | Kaol |
| CK M61      | China   | Kaili        |        | Miaobanpo | 61.00  | N                       | 10.0                 |      |     | 4.6  | 4.1 | 0.0  | 42.3 | 0.0  | 0.0  |
| CK M65      | China   | Kaili        |        | Miaobanpo | 65.00  | N                       | 6.0                  |      |     | 13.7 | 9.7 | 0.0  | 68.6 | 0.0  | 0.0  |
| CK M69      | China   | Kaili        |        | Miaobanpo | 69.00  | N                       | 31.0                 |      |     | 0.0  | 3.4 | 0.0  | 54.6 | 0.0  | 0.0  |
| CK M71      | China   | Kaili        |        | Miaobanpo | 71.00  | N                       | 34.0                 |      |     | 5.5  | 6.9 | 0.0  | 54.5 | 0.0  | 0.0  |
| CK M73      | China   | Kaili        |        | Miaobanpo | 73.00  | N                       | 33.0                 |      |     | 6.4  | 0.0 | 0.0  | 59.6 | 0.0  | 0.0  |
| CK M76      | China   | Kaili        |        | Miaobanpo | 76.00  | N                       | 38.0                 |      |     | 5.9  | 2.9 | 0.0  | 31.2 | 0.0  | 0.0  |
| CK M80      | China   | Kaili        |        | Miaobanpo | 80.00  | N                       | 34.0                 |      |     | 4.1  | 0.0 | 0.0  | 61.9 | 0.0  | 0.0  |
| CK M83      | China   | Kaili        |        | Miaobanpo | 83.00  | N                       |                      |      |     | 18.0 | 0.0 | 0.0  | 82.0 | 0.0  | 0.0  |
| CK M88      | China   | Kaili        |        | Miaobanpo | 88.00  | N                       | 29.0                 |      |     | 5.7  | 0.0 | 0.0  | 53.3 | 0.0  | 0.0  |
| CK M90      | China   | Kaili        |        | Miaobanpo | 90.00  | N                       | 39.0                 |      |     | 2.8  | 0.0 | 0.0  | 43.2 | 0.0  | 0.0  |
| CK M93      | China   | Kaili        |        | Miaobanpo | 93.00  | N                       | 34.0                 |      |     | 4.2  | 0.0 | 0.0  | 49.8 | 0.0  | 0.0  |
| CK M96      | China   | Kaili        |        | Miaobanpo | 96.00  | N                       | 46.0                 |      |     | 4.2  | 0.0 | 0.0  | 48.8 | 0.0  | 0.0  |
| CK M101     | China   | Kaili        |        | Miaobanpo | 101.00 | Y                       | 48.0                 |      |     | 0.0  | 0.0 | 0.0  | 34.0 | 0.0  | 0.0  |
| CK M102     | China   | Kaili        |        | Miaobanpo | 102.00 | Y                       | 43.0                 |      |     | 6.6  | 0.0 | 0.0  | 44.4 | 0.0  | 0.0  |
| CK M104     | China   | Kaili        |        | Miaobanpo | 104.00 | Y                       | 38.0                 |      |     | 11.6 | 0.0 | 0.0  | 50.4 | 0.0  | 0.0  |
| CK M116     | China   | Kaili        |        | Miaobanpo | 116.00 | Y                       | 51.0                 |      |     | 0.0  | 0.0 | 0.0  | 32.0 | 0.0  | 0.0  |
| CK M119     | China   | Kaili        |        | Miaobanpo | 119.00 | Y                       | 34.0                 |      |     | 2.7  | 0.0 | 0.0  | 25.3 | 0.0  | 0.0  |
| CK M121     | China   | Kaili        |        | Miaobanpo | 121.00 | Y                       | 51.0                 |      |     | 1.6  | 0.0 | 0.0  | 35.4 | 0.0  | 0.0  |
| CK M126     | China   | Kaili        |        | Miaobanpo | 126.00 | Y                       | 36.0                 |      |     | 3.5  | 0.0 | 0.0  | 43.5 | 0.0  | 0.0  |
| CK M129     | China   | Kaili        |        | Miaobanpo | 129.00 | N                       | 38.0                 |      |     | 7.1  | 0.0 | 0.0  | 47.9 | 0.0  | 0.0  |
| CK M131     | China   | Kaili        |        | Miaobanpo | 131.00 | N                       | 34.0                 |      |     | 0.0  | 0.0 | 39.4 | 0.0  | 25.6 | 0.0  |
| CK M134     | China   | Kaili        |        | Miaobanpo | 134.00 | N                       |                      |      |     | 0.0  | 0.0 | 0.0  | 66.0 | 0.0  | 0.0  |
| CK M136     | China   | Kaili        |        | Miaobanpo | 136.00 | N                       | 39.0                 |      |     | 0.0  | 0.0 | 29.8 | 0.0  | 31.2 | 0.0  |
| CK M138     | China   | Kaili        |        | Miaobanpo | 138.00 | N                       | 49.0                 |      |     | 2.2  | 0.0 | 0.0  | 48.8 | 0.0  | 0.0  |
| CK M141     | China   | Kaili        |        | Miaobanpo | 141.00 | N                       | 34.0                 |      |     | 0.0  | 0.0 | 0.0  | 57.0 | 0.0  | 0.0  |
| CK M144     | China   | Kaili        |        | Miaobanpo | 144.00 | N                       | 54.0                 |      |     | 0.0  | 0.0 | 25.6 | 0.0  | 18.4 | 0.0  |
| CK M147     | China   | Kaili        |        | Miaobanpo | 147.00 | N                       | 40.0                 |      |     | 0.0  | 0.0 | 27.6 | 0.0  | 32.4 | 0.0  |
| CK M149     | China   | Kaili        |        | Miaobanpo | 149.00 | N                       | 34.0                 |      |     | 8.0  | 0.0 | 0.0  | 59.0 | 0.0  | 0.0  |

| Sample Name               | Country        | Stratigraphy     |            |          |        | Contains<br>BST fossils | Composition (% rock) |       |     |      |      |      |      |      |      |
|---------------------------|----------------|------------------|------------|----------|--------|-------------------------|----------------------|-------|-----|------|------|------|------|------|------|
|                           |                | Formation        | Member     | Sequence | Height |                         | Qtz                  | Calc  | Dol | Bth  | Gl   | Cel  | Il 1 | Il 2 | Kaol |
| YPM 10470                 | China          | Shipai           |            |          |        | N                       |                      |       |     | 15.5 | 7.9  | 15.5 | 59.1 | 0.0  | 0.0  |
| YPM 72897                 | Czechoslovakia | Etage C          |            |          |        | N                       | 58.0                 |       |     | 0.1  | 2.0  | 0.0  | 32.0 | 0.0  | 0.0  |
| YPM 154397                | UK             |                  |            |          |        | N                       | 34.0                 |       |     | 18.0 | 17.5 | 0.0  | 0.0  | 26.5 | 0.0  |
| YPM 163786                | USA            | Pioche           | Pioche D   |          |        | N                       |                      |       |     | 0.0  | 0.0  | 16.7 | 0.0  | 83.3 | 0.0  |
| YPM 203937                | USA            | Campito          | Montenegro |          |        | N                       | 29.0                 |       |     | 8.0  | 0.0  | 59.0 | 0.0  | 0.0  | 4.0  |
| YPM 204003                | USA            | Latham           |            |          |        | N                       | 45.0                 |       |     | 0.0  | 0.0  | 0.0  | 31.7 | 23.3 | 0.0  |
| YPM 421785                | China          | Balang           |            |          |        | N                       | 59.0                 |       |     | 0.0  | 0.0  | 25.5 | 16.5 | 0.0  | 0.0  |
| YPM 424052                | USA            | Rogersville      |            |          |        | N                       |                      |       |     | 11.5 | 0.0  | 0.0  | 88.5 | 0.0  | 0.0  |
| YPM 424072                | China          | Balang           |            |          |        | N                       | 41.0                 | 3.0   |     | 5.9  | 0.0  | 0.0  | 32.1 | 0.0  | 0.0  |
| YPM 534372                | USA            |                  |            |          |        | N                       |                      | 100.0 |     | 0.0  | 0.0  | 0.0  | 0.0  | 0.0  | 0.0  |
| YPM 534374                | USA            | Meagher          |            |          |        | N                       | 18.0                 | 56.0  |     | 0.0  | 12.6 | 11.4 | 0.0  | 0.0  | 0.0  |
| OUMNH A.806               | UK             |                  |            |          |        | N                       |                      |       |     | 0.0  | 9.5  | 6.2  | 60.3 | 0.0  | 0.0  |
| OUMNH A.1752b-<br>A.1753a | UK             |                  |            |          |        | N                       | 30.0                 |       |     | 17.1 | 8.9  | 1.5  | 0.0  | 19.5 | 0.0  |
| OUMNH A.2325a             | UK             |                  |            |          |        | N                       | 55.0                 | 14.0  |     | 1.5  | 4.9  | 1.2  | 0.0  | 2.4  | 0.0  |
| OUMNH A.2346a             | UK             |                  |            |          |        | N                       | 37.0                 | 4.0   |     | 17.2 | 13.5 | 0.0  | 1.9  | 13.4 | 0.0  |
| OUMNH A.2361              | UK             |                  |            |          |        | N                       | 37.0                 |       |     | 15.3 | 6.6  | 9.8  | 0.0  | 20.3 | 0.0  |
| OUMNH A.2374              | UK             |                  |            |          |        | N                       | 42.0                 |       |     | 16.1 | 16.7 | 2.7  | 0.0  | 22.5 | 0.0  |
| OUMNH A.2470a             | UK             |                  |            |          |        | N                       | 38.0                 |       |     | 12.8 | 11.1 | 0.0  | 6.3  | 18.8 | 0.0  |
| OUMNH AT.93a              | Canada         | Hanford<br>Brook |            |          |        | N                       | 54.0                 |       |     | 0.0  | 17.9 | 0.0  | 4.5  | 18.6 | 0.0  |
| OUMN AT.103b              | Canada         | Hanford<br>Brook |            |          |        | N                       | 26.0                 |       |     | 0.0  | 0.0  | 35.6 | 0.0  | 35.4 | 0.0  |
| OUMNH AX.13               | Morocco        |                  |            |          |        | N                       | 16.0                 | 23.0  |     | 0.0  | 12.8 | 23.2 | 0.0  | 0.0  | 0.0  |
| OUMNH AX. 19a             | Morocco        |                  |            |          |        | N                       | 36.0                 |       |     | 6.4  | 0.0  | 43.6 | 0.0  | 0.0  | 0.0  |
| S7C_25                    | Canada         | Stephen          |            |          |        | Y                       | 34.0                 | 9.0   |     | 20.2 | 9.2  | 5.6  | 0.0  | 9.3  | 7.7  |
| S7A_0_5                   | Canada         | Stephen          |            |          |        | Y                       | 17.0                 | 13.0  |     | 22.8 | 8.3  | 12.8 | 0.0  | 12.1 | 0.0  |
| S7A_4                     | Canada         | Stephen          |            |          |        | Y                       | 46.0                 |       |     | 17.4 | 7.7  | 3.3  | 0.0  | 25.6 | 0.0  |
| S7A_12                    | Canada         | Stephen          |            |          |        | Y                       | 27.0                 | 8.0   |     | 19.5 | 7.1  | 4.6  | 0.0  | 33.9 | 0.0  |
| S7A_8                     | Canada         | Stephen          |            |          |        | Y                       | 23.0                 | 8.0   |     | 27.2 | 12.0 | 0.0  | 0.0  | 20.8 | 0.0  |

| Sample Name | Country | Stratigraphy |         |          |        | Contains<br>BST fossils | Composition (% rock) |      |      |      |      |      |      |      |      |
|-------------|---------|--------------|---------|----------|--------|-------------------------|----------------------|------|------|------|------|------|------|------|------|
|             |         | Formation    | Member  | Sequence | Height |                         | Qtz                  | Calc | Dol  | Bth  | Gl   | Cel  | Il 1 | Il 2 | Kaol |
| S7A_16      | Canada  | Stephen      |         |          |        | Y                       | 33.0                 | 3.0  |      | 22.2 | 8.2  | 0.0  | 0.0  | 28.7 | 0.0  |
| S7C_4_5     | Canada  | Stephen      |         |          |        | Y                       | 33.0                 | 36.0 | 12.0 | 4.4  | 4.5  | 5.4  | 0.0  | 4.7  | 0.0  |
| S7C_6       | Canada  | Stephen      |         |          |        | Y                       | 7.0                  | 81.0 |      | 0.1  | 0.3  | 0.5  | 0.0  | 0.0  | 0.0  |
| S7C_8       | Canada  | Stephen      |         |          |        | Y                       |                      |      | 54.0 | 0.0  | 0.0  | 0.0  | 0.0  | 0.0  | 0.0  |
| S7C_10_5    | Canada  | Stephen      |         |          |        | Y                       |                      |      | 36.0 | 2.5  | 15.8 | 15.8 | 0.0  | 0.9  | 0.0  |
| S7C_12      | Canada  | Stephen      |         |          |        | Y                       |                      | 79.0 | 3.0  | 0.0  | 0.0  | 0.0  | 0.0  | 0.0  | 0.0  |
| S7C_14      | Canada  | Stephen      |         |          |        | Y                       | 30.0                 | 24.0 |      | 18.3 | 5.7  | 6.7  | 0.0  | 11.5 | 1.7  |
| S7C_14_5    | Canada  | Stephen      |         |          |        | Y                       | 31.0                 | 24.0 |      | 16.0 | 4.3  | 7.1  | 0.0  | 8.9  | 1.6  |
| S7_15       | Canada  | Stephen      |         |          |        | Y                       | 24.0                 | 20.0 |      | 18.5 | 5.1  | 6.1  | 0.0  | 11.3 | 0.0  |
| S7_17       | Canada  | Stephen      |         |          |        | Y                       | 32.0                 | 21.0 |      | 19.0 | 6.8  | 4.0  | 0.0  | 15.4 | 1.8  |
| S7_19       | Canada  | Stephen      |         |          |        | Y                       | 34.0                 | 5.0  |      | 19.5 | 5.3  | 0.0  | 0.0  | 13.0 | 5.3  |
| S7_20       | Canada  | Stephen      |         |          |        | Y                       | 56.0                 |      |      | 16.2 | 4.9  | 0.0  | 0.0  | 19.6 | 2.3  |
| S7_22       | Canada  | Stephen      |         |          |        | Y                       | 18.0                 | 2.0  | 7.0  | 19.6 | 6.8  | 0.0  | 0.0  | 35.7 | 4.8  |
| S7_27_5     | Canada  | Stephen      |         |          |        | Y                       | 41.0                 | 12.0 |      | 19.6 | 8.0  | 0.0  | 0.0  | 11.8 | 5.6  |
| CL_1        | USA     | Latham Shale |         |          |        | N                       | 27.0                 |      |      | 16.2 | 0.0  | 0.0  | 0.0  | 47.8 | 0.0  |
| CL_2        | USA     | Latham Shale |         |          |        | N                       | 50.0                 |      |      | 0.0  | 0.0  | 9.3  | 0.0  | 31.7 | 0.0  |
| CL_3        | USA     | Latham Shale |         |          |        | N                       | 40.0                 |      |      | 0.0  | 0.0  | 7.1  | 0.0  | 43.9 | 0.0  |
| CL_4        | USA     | Latham Shale |         |          |        | N                       | 34.0                 |      |      | 0.0  | 0.0  | 10.5 | 0.0  | 38.5 | 0.0  |
| CL_5        | USA     | Latham Shale |         |          |        | N                       | 33.0                 |      |      | 0.0  | 0.0  | 6.4  | 0.0  | 60.6 | 0.0  |
| CL_6        | USA     | Latham Shale |         |          |        | N                       | 21.0                 |      |      | 0.0  | 0.0  | 11.8 | 0.0  | 57.2 | 0.0  |
| CPH_1       | USA     | Carrara      |         |          |        | N                       |                      |      |      | 20.9 | 0.0  | 32.5 | 0.0  | 46.6 | 0.0  |
| CPH_2       | USA     | Carrara      |         |          |        | N                       | 36.0                 | 7.0  |      | 12.8 | 3.7  | 16.4 | 0.0  | 25.0 | 0.0  |
| CPH_3       | USA     | Carrara      |         |          |        | N                       | 18.0                 |      |      | 21.7 | 0.0  | 19.5 | 0.0  | 37.8 | 0.0  |
| CPH_4       | USA     | Carrara      |         |          |        | N                       |                      |      |      | 28.8 | 0.0  | 29.5 | 0.0  | 41.7 | 0.0  |
| CPH_5       | USA     | Carrara      |         |          |        | N                       | 27.0                 |      |      | 15.7 | 3.4  | 18.2 | 0.0  | 30.7 | 0.0  |
| FP_1        | Canada  | Stephen      | Burgess |          |        | Y                       |                      | 7.0  | 6.0  | 26.0 | 1.6  | 18.5 | 0.0  | 30.9 | 0.0  |

| Sample Name | Country | Stratigraphy |         |          |        | Contains<br>BST fossils | Composition (% rock) |      |      |      |      |      |      |      |      |
|-------------|---------|--------------|---------|----------|--------|-------------------------|----------------------|------|------|------|------|------|------|------|------|
|             |         | Formation    | Member  | Sequence | Height |                         | Qtz                  | Calc | Dol  | Bth  | Gl   | Cel  | Il 1 | Il 2 | Kaol |
| FP_2        | Canada  | Stephen      | Burgess |          |        | Y                       | 16.0                 | 10.0 |      | 21.0 | 3.2  | 20.3 | 0.0  | 20.5 | 0.0  |
| FP_3_7      | Canada  | Stephen      | Burgess |          |        | Y                       | 30.0                 | 12.0 |      | 28.0 | 3.0  | 10.7 | 0.0  | 16.3 | 0.0  |
| FP_4_9      | Canada  | Stephen      | Burgess |          |        | Y                       | 27.0                 | 15.0 | 2.0  | 17.4 | 3.6  | 10.0 | 0.0  | 14.0 | 0.0  |
| FP_6        | Canada  | Stephen      | Burgess |          |        | Y                       | 20.0                 | 16.0 |      | 13.8 | 4.8  | 11.1 | 0.0  | 13.3 | 0.0  |
| FP_7        | Canada  | Stephen      | Burgess |          |        | Y                       | 18.0                 | 15.0 |      | 23.4 | 8.0  | 11.4 | 0.0  | 16.1 | 0.0  |
| FP_8_9      | Canada  | Stephen      | Burgess |          |        | Y                       |                      | 4.0  | 25.0 | 1.4  | 0.7  | 9.3  | 0.0  | 31.6 | 0.0  |
| FP_9        | Canada  | Stephen      | Burgess |          |        | Y                       | 26.0                 | 24.0 |      | 8.5  | 4.7  | 8.8  | 0.0  | 8.0  | 0.0  |
| FP_10       | Canada  | Stephen      | Burgess |          |        | Y                       | 12.0                 | 69.0 | 6.0  | 0.2  | 0.9  | 2.0  | 0.0  | 0.0  | 0.0  |
| FP_11       | Canada  | Stephen      | Burgess |          |        | Y                       | 15.0                 | 63.0 | 2.0  | 0.0  | 0.0  | 0.0  | 0.0  | 0.0  | 0.0  |
| FP_12       | Canada  | Stephen      | Burgess |          |        | Y                       | 19.0                 | 21.0 | 5.0  | 15.4 | 7.8  | 11.4 | 0.0  | 11.4 | 0.0  |
| FP_20       | Canada  | Stephen      | Burgess |          |        | Y                       | 17.0                 | 8.0  | 15.0 | 17.5 | 5.3  | 6.7  | 0.0  | 24.5 | 0.0  |
| FP_20_5     | Canada  | Stephen      | Burgess |          |        | Y                       | 27.0                 | 3.0  |      | 25.7 | 0.0  | 5.5  | 0.0  | 26.8 | 0.0  |
| FP_21_8     | Canada  | Stephen      | Burgess |          |        | Y                       | 36.0                 |      |      | 19.4 | 9.3  | 11.7 | 0.0  | 12.6 | 0.0  |
| FP_22       | Canada  | Stephen      | Burgess |          |        | Y                       | 15.0                 | 25.0 |      | 15.4 | 14.6 | 14.3 | 0.0  | 9.7  | 0.0  |
| FP_23       | Canada  | Stephen      | Burgess |          |        | Y                       | 17.0                 | 11.0 | 14.0 | 11.0 | 5.6  | 12.0 | 0.0  | 22.4 | 0.0  |
| FP_24       | Canada  | Stephen      | Burgess |          |        | Y                       | 27.0                 | 31.0 |      | 7.8  | 7.3  | 7.6  | 0.0  | 3.3  | 0.0  |
| FP_25       | Canada  | Stephen      | Burgess |          |        | Y                       | 21.0                 | 28.0 |      | 11.1 | 8.0  | 9.0  | 0.0  | 6.9  | 0.0  |
| FP_26       | Canada  | Stephen      | Burgess |          |        | Y                       | 30.0                 | 6.0  |      | 23.3 | 4.2  | 5.4  | 0.0  | 13.1 | 0.0  |
| FP_27       | Canada  | Stephen      | Burgess |          |        | Y                       | 28.0                 | 16.0 |      | 12.6 | 4.5  | 11.6 | 0.0  | 7.2  | 0.0  |
| FP_28       | Canada  | Stephen      | Burgess |          |        | Y                       | 39.0                 | 6.0  |      | 17.0 | 3.3  | 4.8  | 0.0  | 19.0 | 0.0  |
| FP_30       | Canada  | Stephen      | Burgess |          |        | Y                       |                      | 9.0  | 1.0  | 26.2 | 12.2 | 9.5  | 0.0  | 29.0 | 0.0  |
| FP_31       | Canada  | Stephen      | Burgess |          |        | Y                       | 22.0                 | 26.0 |      | 11.3 | 6.5  | 7.6  | 0.0  | 9.7  | 0.0  |
| FP_32       | Canada  | Stephen      | Burgess |          |        | Y                       |                      | 9.0  | 2.0  | 16.8 | 21.7 | 2.5  | 0.0  | 32.0 | 0.0  |
| FP_33       | Canada  | Stephen      | Burgess |          |        | Y                       | 4.0                  | 2.0  |      | 14.0 | 0.0  | 24.7 | 0.0  | 47.3 | 0.0  |
| FP_35       | Canada  | Stephen      | Burgess |          |        | Y                       | 18.0                 | 5.0  |      | 20.9 | 11.6 | 4.0  | 0.0  | 27.5 | 0.0  |
| FP_36       | Canada  | Stephen      | Burgess |          |        | Y                       | 28.0                 | 2.0  |      | 21.3 | 10.5 | 0.0  | 0.0  | 31.1 | 0.0  |
| FP_37       | Canada  | Stephen      | Burgess |          |        | Y                       | 37.0                 | 3.0  |      | 11.2 | 9.8  | 0.0  | 0.0  | 24.0 | 0.0  |
| FP_38       | Canada  | Stephen      | Burgess |          |        | Y                       | 19.0                 | 8.0  |      | 21.9 | 7.3  | 3.9  | 0.0  | 27.9 | 0.0  |

| Sample Name  | Country | Stratigraphy |         |          |        | Contains<br>BST fossils | Composition (% rock) |      |      |      |      |      |      |      |      |
|--------------|---------|--------------|---------|----------|--------|-------------------------|----------------------|------|------|------|------|------|------|------|------|
|              |         | Formation    | Member  | Sequence | Height |                         | Qtz                  | Calc | Dol  | Bth  | Gl   | Cel  | Il 1 | Il 2 | Kaol |
| FP_39        | Canada  | Stephen      | Burgess |          |        | Y                       | 27.0                 | 14.0 |      | 16.0 | 8.8  | 9.9  | 0.0  | 24.4 | 0.0  |
| OWC_0_12     | USA     | Pioche       |         |          |        | N                       | 37.0                 |      |      | 15.6 | 9.0  | 0.0  | 0.0  | 30.4 | 0.0  |
| OWC_0_28     | USA     | Pioche       |         |          |        | N                       | 26.0                 |      |      | 16.5 | 7.5  | 12.5 | 0.0  | 28.5 | 0.0  |
| OWC_0_32     | USA     | Pioche       |         |          |        | N                       | 24.0                 |      |      | 17.6 | 9.8  | 12.9 | 0.0  | 28.7 | 0.0  |
| OWC_0_38     | USA     | Pioche       |         |          |        | N                       | 22.0                 |      |      | 20.9 | 11.1 | 5.8  | 0.0  | 40.2 | 0.0  |
| OWC_1        | USA     | Pioche       |         |          |        | Y                       | 24.0                 |      |      | 0.0  | 0.0  | 15.7 | 0.0  | 59.3 | 0.0  |
| RW_1         | USA     | Pioche       |         |          |        | N                       | 30.0                 |      |      | 17.2 | 0.0  | 28.0 | 0.0  | 24.9 | 0.0  |
| RW_2         | USA     | Pioche       |         |          |        | N                       | 24.0                 |      |      | 20.6 | 0.0  | 14.7 | 0.0  | 34.7 | 0.0  |
| RW_3         | USA     | Pioche       |         |          |        | N                       | 44.0                 |      |      | 9.9  | 0.0  | 18.8 | 0.0  | 21.3 | 0.0  |
| RW_4         | USA     | Pioche       |         |          |        | N                       | 40.0                 | 3.0  |      | 13.0 | 1.6  | 16.5 | 0.0  | 26.0 | 0.0  |
| RW_5         | USA     | Pioche       |         |          |        | N                       | 27.0                 |      |      | 15.3 | 0.0  | 16.9 | 0.0  | 40.8 | 0.0  |
| RW_6         | USA     | Pioche       |         |          |        | N                       |                      |      |      | 23.4 | 3.1  | 24.9 | 0.0  | 48.5 | 0.0  |
| WHY_S_41     | Canada  | Stephen      | Burgess |          |        | Y                       | 68.0                 |      | 6.0  | 0.0  | 0.0  | 0.0  | 0.0  | 0.0  | 0.0  |
| WHY_S_43     | Canada  | Stephen      | Burgess |          |        | Y                       |                      | 42.0 | 31.0 | 0.0  | 0.0  | 0.0  | 0.0  | 0.0  | 0.0  |
| WHY_S_47     | Canada  | Stephen      | Burgess |          |        | Y                       | 18.0                 | 4.0  |      | 32.9 | 5.5  | 9.2  | 0.0  | 20.4 | 0.0  |
| WHY_S_51     | Canada  | Stephen      | Burgess |          |        | Y                       | 24.0                 | 7.0  |      | 27.5 | 3.2  | 8.5  | 0.0  | 20.8 | 0.0  |
| WHY_S_53     | Canada  | Stephen      | Burgess |          |        | Y                       | 34.0                 | 36.0 |      | 7.0  | 7.4  | 7.1  | 0.0  | 4.4  | 0.0  |
| WHY_S_55     | Canada  | Stephen      | Burgess |          |        | Y                       | 17.0                 | 19.0 | 3.0  | 19.2 | 8.4  | 10.8 | 0.0  | 11.6 | 0.0  |
| WHY_S_45 (5) | Canada  | Stephen      | Burgess |          |        | Y                       |                      | 53.0 | 12.0 | 0.0  | 0.0  | 0.0  | 0.0  | 0.0  | 0.0  |
| YPM 200359   | USA     | Wheeler      |         |          |        | Y                       | 28.0                 | 40.0 |      | 8.4  | 6.7  | 7.6  | 7.3  | 0.0  | 0.0  |
| YPM 219298   | Canada  | Stephen      |         |          |        | Y                       | 33.0                 | 5.0  | 2.0  | 13.0 | 16.3 | 0.0  | 0.0  | 19.7 | 0.0  |
| YPM 424000   | China   | Kaili        |         |          |        | Y                       | 47.0                 |      |      | 9.2  | 3.4  | 0.0  | 40.3 | 0.0  | 0.0  |
| YPM 529546   | USA     | Langston     | Spence  |          |        | Y                       |                      | 6.0  |      | 26.6 | 10.9 | 2.9  | 0.0  | 47.7 | 0.0  |
| YPM 533117   | USA     | Wheeler      |         |          |        | Y                       | 25.0                 | 20.0 |      | 13.1 | 5.9  | 15.4 | 0.0  | 10.6 | 0.0  |
| YPM 534367   | Canada  | Stephen      | Burgess |          |        | Y                       | 33.0                 | 9.0  |      | 12.1 | 17.0 | 0.0  | 0.0  | 26.9 | 0.0  |
| YPM 14392    | USA     | Kinzers      |         |          |        | Y                       | 18.0                 |      |      | 11.7 | 0.0  | 62.8 | 0.0  | 2.7  | 4.8  |



**Table DR1:** Sample identifications and mineralogical composition. Abbreviations: Qtz = quartz, Calc = calcite, Dol = dolomite, Bth = berthierine/chamosite, Gl = glauconite, Cel = celadonite, Il 1 = illite composition 1, Il 2 = illite composition 2, Kaol = kaolinite.
